# Supplementary material
Source: MDPI journal article supplement (https://www.mdpi.com/2227-9040/11/2/80)
Supplement: s1 [file s1]

**Table S1:** Information about olive variety, region and sub-region of production, harvesting year for all the samples collected and analyzed.

|    | Sample Coding | Variety   | Region      | Sub-region | Harvesting Year |
|----|---------------|-----------|-------------|------------|-----------------|
| 1  | KOL_LES_50    | Kolovi    | Lesvos      | Lesvos     | 2020            |
| 2  | KOL_LES_51    | Kolovi    | Lesvos      | Lesvos     | 2020            |
| 3  | KOL_LES_52    | Kolovi    | Lesvos      | Lesvos     | 2020            |
| 4  | KOL_LES_53    | Kolovi    | Lesvos      | Lesvos     | 2020            |
| 5  | KOL_LES_54    | Kolovi    | Lesvos      | Lesvos     | 2020            |
| 6  | KOL_LES_55    | Kolovi    | Lesvos      | Lesvos     | 2020            |
| 7  | KOR_ACH_01    | Koroneiki | Peloponnese | Achaia     | 2020            |
| 8  | KOR_ACH_02    | Koroneiki | Peloponnese | Achaia     | 2020            |
| 9  | KOR_ACH_03    | Koroneiki | Peloponnese | Achaia     | 2020            |
| 10 | KOR_ACH_04    | Koroneiki | Peloponnese | Achaia     | 2020            |
| 11 | KOR_ACH_05    | Koroneiki | Peloponnese | Achaia     | 2020            |
| 12 | KOR_ACH_06    | Koroneiki | Peloponnese | Achaia     | 2020            |
| 13 | KOR_ACH_07    | Koroneiki | Peloponnese | Achaia     | 2020            |
| 14 | KOR_ACH_08    | Koroneiki | Peloponnese | Achaia     | 2020            |
| 15 | KOR_ACH_09    | Koroneiki | Peloponnese | Achaia     | 2020            |
| 16 | KOR_ACH_10    | Koroneiki | Peloponnese | Achaia     | 2020            |
| 17 | KOR_CHA_14    | Koroneiki | Crete       | Chania     | 2020            |
| 18 | KOR_CHA_15    | Koroneiki | Crete       | Chania     | 2020            |
| 19 | KOR_CHA_16    | Koroneiki | Crete       | Chania     | 2020            |
| 20 | KOR_CHA_17    | Koroneiki | Crete       | Chania     | 2020            |
| 21 | KOR_CHA_18    | Koroneiki | Crete       | Chania     | 2020            |
| 22 | KOR_CHA_19    | Koroneiki | Crete       | Chania     | 2020            |
| 23 | KOR_CHA_20    | Koroneiki | Crete       | Chania     | 2020            |
| 24 | KOR_EL_01     | Koroneiki | Peloponnese | Ilia       | 2020            |
| 25 | KOR_EL_02     | Koroneiki | Peloponnese | Ilia       | 2020            |
| 26 | KOR_EL_03     | Koroneiki | Peloponnese | Ilia       | 2020            |
| 27 | KOR_EL_04     | Koroneiki | Peloponnese | Ilia       | 2020            |
| 28 | KOR_EL_05     | Koroneiki | Peloponnese | Ilia       | 2020            |
| 29 | KOR_EL_06     | Koroneiki | Peloponnese | Ilia       | 2020            |
| 30 | KOR_EL_07     | Koroneiki | Peloponnese | Ilia       | 2020            |
| 31 | KOR_EL_08     | Koroneiki | Peloponnese | Ilia       | 2020            |
| 32 | KOR_EL_09     | Koroneiki | Peloponnese | Ilia       | 2020            |
| 33 | KOR_EL_10     | Koroneiki | Peloponnese | Ilia       | 2020            |
| 34 | KOR_EL_11     | Koroneiki | Peloponnese | Ilia       | 2020            |
| 35 | KOR_HER_13    | Koroneiki | Crete       | Heraklion  | 2020            |
| 36 | KOR_HER_14    | Koroneiki | Crete       | Heraklion  | 2020            |
| 37 | KOR_HER_15    | Koroneiki | Crete       | Heraklion  | 2020            |
| 38 | KOR_HER_16    | Koroneiki | Crete       | Heraklion  | 2020            |
| 39 | KOR_HER_17    | Koroneiki | Crete       | Heraklion  | 2020            |
| 40 | KOR_HER_18    | Koroneiki | Crete       | Heraklion  | 2020            |
| 41 | KOR_HER_19    | Koroneiki | Crete       | Heraklion  | 2020            |
| 42 | KOR_HER_20    | Koroneiki | Crete       | Heraklion  | 2020            |
| 43 | KOR_HER_21    | Koroneiki | Crete       | Heraklion  | 2020            |

|    | Sample Coding   | Variety    | Region      | Sub-region | Harvesting Year |
|----|-----------------|------------|-------------|------------|-----------------|
| 44 | KOR_HER_22      | Koroneiki  | Crete       | Heraklion  | 2020            |
| 45 | KOR_HER_23      | Koroneiki  | Crete       | Heraklion  | 2020            |
| 46 | KOR_HER_24      | Koroneiki  | Crete       | Heraklion  | 2020            |
| 49 | KOR_LAS_08      | Koroneiki  | Crete       | Lasithi    | 2020            |
| 50 | KOR_LAS_09      | Koroneiki  | Crete       | Lasithi    | 2020            |
| 51 | KOR_LAS_10      | Koroneiki  | Crete       | Lasithi    | 2020            |
| 52 | KOR_LAS_11      | Koroneiki  | Crete       | Lasithi    | 2020            |
| 53 | KOR_LAS_12      | Koroneiki  | Crete       | Lasithi    | 2020            |
| 54 | KOR_LAS_13      | Koroneiki  | Crete       | Lasithi    | 2020            |
| 55 | KOR_LAS_14      | Koroneiki  | Crete       | Lasithi    | 2020            |
| 56 | KOR_LAS_15      | Koroneiki  | Crete       | Lasithi    | 2020            |
| 57 | KOR_MES_13_MAIX | Koroneiki  | Peloponnese | Messenia   | 2020            |
| 58 | KOR_MES_5_MAIX  | Koroneiki  | Peloponnese | Messenia   | 2020            |
| 59 | KOR_MES_7_MAIX  | Koroneiki  | Peloponnese | Messenia   | 2020            |
| 60 | KOR_MES_9_MAIX  | Koroneiki  | Peloponnese | Messenia   | 2020            |
| 61 | KOR_RET_09      | Koroneiki  | Crete       | Rethymno   | 2020            |
| 62 | KOR_RET_10      | Koroneiki  | Crete       | Rethymno   | 2020            |
| 63 | KOR_RET_11      | Koroneiki  | Crete       | Rethymno   | 2020            |
| 64 | KOR_RET_12      | Koroneiki  | Crete       | Rethymno   | 2020            |
| 65 | KOR_RET_13      | Koroneiki  | Crete       | Rethymno   | 2020            |
| 66 | KOR_RET_14      | Koroneiki  | Crete       | Rethymno   | 2020            |
| 67 | KOR_RET_15      | Koroneiki  | Crete       | Rethymno   | 2020            |
| 68 | ADR_LES_19      | Adramytini | Lesvos      | Lesvos     | 2019            |
| 69 | ADR_LES_27      | Adramytini | Lesvos      | Lesvos     | 2019            |
| 70 | ADR_LES_28      | Adramytini | Lesvos      | Lesvos     | 2019            |
| 71 | ADR_LES_29      | Adramytini | Lesvos      | Lesvos     | 2019            |
| 72 | ADR_LES_30      | Adramytini | Lesvos      | Lesvos     | 2019            |
| 73 | ADR_LES_31      | Adramytini | Lesvos      | Lesvos     | 2019            |
| 74 | ADR_LES_32      | Adramytini | Lesvos      | Lesvos     | 2019            |
| 75 | KOL_LES_17      | Kolovi     | Lesvos      | Lesvos     | 2019            |
| 76 | KOL_LES_18      | Kolovi     | Lesvos      | Lesvos     | 2019            |
| 77 | KOL_LES_20      | Kolovi     | Lesvos      | Lesvos     | 2019            |
| 78 | KOL_LES_21      | Kolovi     | Lesvos      | Lesvos     | 2019            |
| 79 | KOL_LES_22      | Kolovi     | Lesvos      | Lesvos     | 2019            |
| 80 | KOL_LES_23      | Kolovi     | Lesvos      | Lesvos     | 2019            |
| 81 | KOL_LES_24      | Kolovi     | Lesvos      | Lesvos     | 2019            |
| 82 | KOL_LES_25      | Kolovi     | Lesvos      | Lesvos     | 2019            |
| 83 | KOL_LES_26      | Kolovi     | Lesvos      | Lesvos     | 2019            |
| 84 | KOL_LES_33      | Kolovi     | Lesvos      | Lesvos     | 2019            |
| 85 | KOL_LES_34      | Kolovi     | Lesvos      | Lesvos     | 2019            |
| 86 | KOL_LES_35      | Kolovi     | Lesvos      | Lesvos     | 2019            |
| 87 | KOL_LES_36      | Kolovi     | Lesvos      | Lesvos     | 2019            |
| 88 | KOL_LES_37      | Kolovi     | Lesvos      | Lesvos     | 2019            |
| 89 | KOL_LES_38      | Kolovi     | Lesvos      | Lesvos     | 2019            |
| 90 | KOL_LES_39      | Kolovi     | Lesvos      | Lesvos     | 2019            |
| 91 | KOL_LES_40      | Kolovi     | Lesvos      | Lesvos     | 2019            |

|     | Sample Coding | Variety   | Region      | Sub-region | Harvesting Year |
|-----|---------------|-----------|-------------|------------|-----------------|
| 92  | KOL_LES_41    | Kolovi    | Lesvos      | Lesvos     | 2019            |
| 93  | KOL_LES_42    | Kolovi    | Lesvos      | Lesvos     | 2019            |
| 94  | KOL_LES_43    | Kolovi    | Lesvos      | Lesvos     | 2019            |
| 95  | KOL_LES_44    | Kolovi    | Lesvos      | Lesvos     | 2019            |
| 96  | KOL_LES_45    | Kolovi    | Lesvos      | Lesvos     | 2019            |
| 97  | KOL_LES_46    | Kolovi    | Lesvos      | Lesvos     | 2019            |
| 98  | KOL_LES_47    | Kolovi    | Lesvos      | Lesvos     | 2019            |
| 99  | KOL_LES_48    | Kolovi    | Lesvos      | Lesvos     | 2019            |
| 100 | KOL_LES_49    | Kolovi    | Lesvos      | Lesvos     | 2019            |
| 101 | KOR_CHA_10    | Koroneiki | Crete       | Chania     | 2019            |
| 102 | KOR_CHA_11    | Koroneiki | Crete       | Chania     | 2019            |
| 103 | KOR_CHA_12    | Koroneiki | Crete       | Chania     | 2019            |
| 104 | KOR_CHA_13    | Koroneiki | Crete       | Chania     | 2019            |
| 105 | KOR_KOR_01    | Koroneiki | Peloponnese | Korinthos  | 2019            |
| 106 | KOR_KOR_02    | Koroneiki | Peloponnese | Korinthos  | 2019            |
| 107 | KOR_KOR_03    | Koroneiki | Peloponnese | Korinthos  | 2019            |
| 108 | KOR_KOR_04    | Koroneiki | Peloponnese | Korinthos  | 2019            |
| 109 | KOR_KOR_05    | Koroneiki | Peloponnese | Korinthos  | 2019            |
| 110 | KOR_MES_13    | Koroneiki | Peloponnese | Messenia   | 2019            |
| 111 | KOR_MES_14    | Koroneiki | Peloponnese | Messenia   | 2019            |
| 112 | KOR_MES_15    | Koroneiki | Peloponnese | Messenia   | 2019            |
| 113 | KOR_MES_16    | Koroneiki | Peloponnese | Messenia   | 2019            |
| 114 | KOR_MES_17    | Koroneiki | Peloponnese | Messenia   | 2019            |
| 115 | KOR_MES_18    | Koroneiki | Peloponnese | Messenia   | 2019            |
| 116 | KOR_MES_19    | Koroneiki | Peloponnese | Messenia   | 2019            |
| 117 | KOR_MES_20    | Koroneiki | Peloponnese | Messenia   | 2019            |
| 118 | KOR_MES_21    | Koroneiki | Peloponnese | Messenia   | 2019            |
| 119 | KOR_MES_22    | Koroneiki | Peloponnese | Messenia   | 2019            |
| 120 | KOR_MES_23    | Koroneiki | Peloponnese | Messenia   | 2019            |
| 121 | KOR_MES_24    | Koroneiki | Peloponnese | Messenia   | 2019            |
| 122 | KOR_MES_25    | Koroneiki | Peloponnese | Messenia   | 2019            |
| 123 | KOR_MES_26    | Koroneiki | Peloponnese | Messenia   | 2019            |
| 124 | KOR_MES_27    | Koroneiki | Peloponnese | Messenia   | 2019            |
| 125 | KOR_MES_28    | Koroneiki | Peloponnese | Messenia   | 2019            |
| 126 | KOR_MES_29    | Koroneiki | Peloponnese | Messenia   | 2019            |
| 127 | KOR_MES_30    | Koroneiki | Peloponnese | Messenia   | 2019            |
| 128 | KOR_MES_31    | Koroneiki | Peloponnese | Messenia   | 2019            |
| 129 | KOR_MES_32    | Koroneiki | Peloponnese | Messenia   | 2019            |

**Table S2:** Volatile composition of EVOOs according to the olive tree cultivar. The values represent the mean content (%) of the samples in each variety. Data in the same row with different lowercase letters differ significantly ( $p < 0.05$ ). ADR: Adramytini variety; KOL: Kolovi variety; KOR: Koroneiki variety

| Compound              | Content (% of Total Identified Compounds) |                    |                    | RID <sup>1</sup> |  |
|-----------------------|-------------------------------------------|--------------------|--------------------|------------------|--|
|                       | ADR                                       | KOL                | KOR                |                  |  |
| <i>Acids</i>          |                                           |                    |                    |                  |  |
| Acetic acid           | 10.98 <sup>a</sup>                        | 4.22 <sup>b</sup>  | 3.75 <sup>b</sup>  | A                |  |
| Propanoic acid        | 0.18 <sup>a</sup>                         | 0.11 <sup>a</sup>  | 0.18 <sup>a</sup>  | A                |  |
| Butanoic acid         | 0.08 <sup>a</sup>                         | 0.17 <sup>a</sup>  | 0.18 <sup>a</sup>  | A                |  |
| 3-Methylbutanoic acid | 0.07 <sup>a</sup>                         | 0.04 <sup>b</sup>  | 0.03 <sup>b</sup>  | B                |  |
| Hexanoic acid         | 0.23 <sup>a</sup>                         | 0.22 <sup>a</sup>  | 0.27 <sup>a</sup>  | A                |  |
| 2-Ethylhexanoic acid  | 0.11 <sup>a</sup>                         | 0.08 <sup>a</sup>  | 0.07 <sup>a</sup>  | B                |  |
| Heptanoic acid        | 0.05 <sup>ab</sup>                        | 0.04 <sup>a</sup>  | 0.06 <sup>b</sup>  | B                |  |
| Octanoic acid         | 0.13 <sup>a</sup>                         | 0.07 <sup>b</sup>  | 0.08 <sup>b</sup>  | A                |  |
| Nonanoic acid         | 0.56 <sup>a</sup>                         | 0.22 <sup>b</sup>  | 0.38 <sup>a</sup>  | B                |  |
| <i>Alcohols</i>       |                                           |                    |                    |                  |  |
| Ethanol               | 4.82 <sup>a</sup>                         | 3.80 <sup>a</sup>  | 4.63 <sup>a</sup>  | A                |  |
| 1-Propanol            | 0.06 <sup>a</sup>                         | 0.03 <sup>b</sup>  | 0.02 <sup>c</sup>  | A                |  |
| 2-Methyl-1-propanol   | 0.60 <sup>a</sup>                         | 0.22 <sup>b</sup>  | 0.10 <sup>c</sup>  | A                |  |
| 3-Pentanol            | 0.83 <sup>a</sup>                         | 0.55 <sup>a</sup>  | 0.42 <sup>a</sup>  | A                |  |
| 1-Butanol             | 0.07 <sup>a</sup>                         | 0.15 <sup>a</sup>  | 0.09 <sup>a</sup>  | A                |  |
| 1-Penten-3-ol         | 9.57 <sup>ab</sup>                        | 7.45 <sup>a</sup>  | 10.78 <sup>b</sup> | A                |  |
| 3-Methyl-1-butanol    | 1.55 <sup>a</sup>                         | 0.39 <sup>b</sup>  | 0.17 <sup>c</sup>  | A                |  |
| 1-Pentanol            | 0.71 <sup>a</sup>                         | 0.55 <sup>a</sup>  | 0.34 <sup>b</sup>  | A                |  |
| (Z)-2-Penten-1-ol     | 2.41 <sup>a</sup>                         | 3.34 <sup>a</sup>  | 4.16 <sup>b</sup>  | B                |  |
| 1-Hexanol             | 8.15 <sup>a</sup>                         | 7.94 <sup>a</sup>  | 4.46 <sup>b</sup>  | A                |  |
| (E)-3-Hexen-1-ol      | 0.38 <sup>a</sup>                         | 0.26 <sup>a</sup>  | 0.28 <sup>a</sup>  | B                |  |
| (Z)-3-Hexen-1-ol      | 7.94 <sup>ab</sup>                        | 10.96 <sup>a</sup> | 7.83 <sup>b</sup>  | B                |  |
| (E)-2-Hexen-1-ol      | 10.15 <sup>a</sup>                        | 5.83 <sup>a</sup>  | 6.09 <sup>a</sup>  | B                |  |
| 2-Ethyl-1-hexanol     | 1.05 <sup>a</sup>                         | 0.56 <sup>b</sup>  | 0.23 <sup>c</sup>  | B                |  |
| 1-Octanol             | 0.08 <sup>ab</sup>                        | 0.09 <sup>a</sup>  | 0.12 <sup>b</sup>  | A                |  |
| 1-Nonanol             | 0.05 <sup>ab</sup>                        | 0.04 <sup>a</sup>  | 0.09 <sup>b</sup>  | B                |  |
| Benzyl alcohol        | 0.08 <sup>a</sup>                         | 0.09 <sup>a</sup>  | 0.15 <sup>b</sup>  | A                |  |
| Phenethyl alcohol     | 0.26 <sup>a</sup>                         | 0.25 <sup>a</sup>  | 0.46 <sup>b</sup>  | A                |  |
| <i>Aldehydes</i>      |                                           |                    |                    |                  |  |
| 2-Methylbutanal       | 1.29 <sup>a</sup>                         | 0.64 <sup>b</sup>  | 0.43 <sup>b</sup>  | B                |  |
| 3-Methylbutanal       | 0.42 <sup>a</sup>                         | 0.27 <sup>a</sup>  | 0.21 <sup>a</sup>  | B                |  |
| Pentanal              | 0.63 <sup>a</sup>                         | 0.62 <sup>a</sup>  | 0.83 <sup>a</sup>  | B                |  |
| Hexanal               | 0.67 <sup>a</sup>                         | 0.93 <sup>a</sup>  | 1.46 <sup>b</sup>  | A                |  |
| (E)-2-Pentenal        | 0.06 <sup>a</sup>                         | 0.21 <sup>a</sup>  | 0.37 <sup>b</sup>  | B                |  |
| (Z)-3-Hexenal         | 0.07 <sup>a</sup>                         | 0.45 <sup>b</sup>  | 0.54 <sup>b</sup>  | B                |  |
| (E)-3-Hexenal         | 0.24 <sup>a</sup>                         | 2.96 <sup>ab</sup> | 3.17 <sup>b</sup>  | B                |  |
| Heptanal              | 0.03 <sup>a</sup>                         | 0.05 <sup>a</sup>  | 0.12 <sup>b</sup>  | B                |  |
| (E)-2-Hexenal         | 0.30 <sup>a</sup>                         | 0.98 <sup>a</sup>  | 2.01 <sup>b</sup>  | B                |  |
| Octanal               | 0.03 <sup>a</sup>                         | 0.05 <sup>a</sup>  | 0.11 <sup>b</sup>  | B                |  |
| Nonanal               | 0.23 <sup>a</sup>                         | 0.33 <sup>a</sup>  | 0.79 <sup>b</sup>  | B                |  |
| (E,E)-2,4-Hexadienal  | 0.21 <sup>a</sup>                         | 0.62 <sup>a</sup>  | 0.44 <sup>b</sup>  | B                |  |
| Benzaldehyde          | 0.09 <sup>ab</sup>                        | 0.08 <sup>a</sup>  | 0.10 <sup>b</sup>  | A                |  |
| (E)-4-Oxohex-2-enal   | 0.18 <sup>a</sup>                         | 1.19 <sup>a</sup>  | 1.41 <sup>a</sup>  | B                |  |
| <i>Esters</i>         |                                           |                    |                    |                  |  |
| Methyl acetate        | 1.23 <sup>a</sup>                         | 0.61 <sup>b</sup>  | 0.34 <sup>c</sup>  | A                |  |

| Compound                          | Content (% of Total Identified Compounds) |                    |                    | RID <sup>1</sup> |
|-----------------------------------|-------------------------------------------|--------------------|--------------------|------------------|
|                                   | ADR                                       | KOL                | KOR                |                  |
| Ethyl acetate                     | 9.35 <sup>a</sup>                         | 4.15 <sup>b</sup>  | 3.08 <sup>b</sup>  | A                |
| Hexyl acetate                     | 0.20 <sup>a</sup>                         | 1.36 <sup>b</sup>  | 2.74 <sup>c</sup>  | A                |
| (Z)-3-Hexenyl acetate             | 0.58 <sup>a</sup>                         | 4.46 <sup>b</sup>  | 10.49 <sup>c</sup> | B                |
| Methylbenzoate                    | 0.01 <sup>a</sup>                         | 0.01 <sup>a</sup>  | 0.05 <sup>b</sup>  | B                |
| Methylsalicylate                  | 0.16 <sup>a</sup>                         | 0.14 <sup>a</sup>  | 0.10 <sup>b</sup>  | B                |
| Methyl 2-oxohexanoate             | 0.23 <sup>a</sup>                         | 1.22 <sup>a</sup>  | 0.98 <sup>ab</sup> | C                |
| <i>Hydrocarbons</i>               |                                           |                    |                    |                  |
| Benzene                           | 0.07 <sup>a</sup>                         | 0.13 <sup>a</sup>  | 0.21 <sup>a</sup>  | B                |
| n-Octane                          | 0.16 <sup>a</sup>                         | 0.22 <sup>a</sup>  | 0.29 <sup>a</sup>  | A                |
| 3-Ethyl-1,5-octadiene (isomer 1)  | 1.05 <sup>a</sup>                         | 1.40 <sup>a</sup>  | 2.21 <sup>b</sup>  | B                |
| 3-Ethyl-1,5-octadiene (isomer 2)  | 0.34 <sup>a</sup>                         | 0.49 <sup>a</sup>  | 0.83 <sup>b</sup>  | B                |
| 4-Methyl-2,6-Octadiene            | 2.45 <sup>a</sup>                         | 4.21 <sup>a</sup>  | 3.64 <sup>a</sup>  | C                |
| 3-Ethyl-1,4-hexadiene             | 0.05 <sup>a</sup>                         | 0.07 <sup>a</sup>  | 0.19 <sup>b</sup>  | C                |
| <i>Ketones</i>                    |                                           |                    |                    |                  |
| 2-Butanone                        | 0.07 <sup>a</sup>                         | 0.06 <sup>a</sup>  | 0.10 <sup>a</sup>  | B                |
| 3-Pentanone                       | 15.62 <sup>a</sup>                        | 15.77 <sup>a</sup> | 10.38 <sup>b</sup> | B                |
| 1-Penten-3-one                    | 1.03 <sup>a</sup>                         | 7.16 <sup>b</sup>  | 3.40 <sup>a</sup>  | B                |
| 2-Heptanone                       | 0.04 <sup>a</sup>                         | 0.09 <sup>a</sup>  | 0.09 <sup>a</sup>  | B                |
| Acetoin                           | 0.34 <sup>a</sup>                         | 0.26 <sup>a</sup>  | 0.21 <sup>a</sup>  | A                |
| 2-Octanone                        | 0.04 <sup>a</sup>                         | 0.08 <sup>a</sup>  | 0.10 <sup>a</sup>  | B                |
| 6-Methyl-5-hepten-2-one           | 0.12 <sup>a</sup>                         | 0.09 <sup>b</sup>  | 0.12 <sup>a</sup>  | B                |
| <i>Terpenoids</i>                 |                                           |                    |                    |                  |
| $\alpha$ -Pinene                  | 0.11 <sup>a</sup>                         | 0.09 <sup>a</sup>  | 0.10 <sup>a</sup>  | A                |
| D-Limonene                        | 0.03 <sup>a</sup>                         | 0.07 <sup>a</sup>  | 0.05 <sup>a</sup>  | A                |
| beta-Ocimene                      | 0.25 <sup>a</sup>                         | 0.17 <sup>a</sup>  | 0.18 <sup>a</sup>  | B                |
| p-Cymene                          | 0.02 <sup>a</sup>                         | 0.02 <sup>a</sup>  | 0.03 <sup>a</sup>  | A                |
| (E)-4,8-Dimethylnona-1,3,7-triene | 0.25 <sup>a</sup>                         | 0.23 <sup>a</sup>  | 2.34 <sup>b</sup>  | C                |
| $\alpha$ -Farnesene               | 0.40 <sup>a</sup>                         | 0.15 <sup>b</sup>  | 0.04 <sup>c</sup>  | B                |
| <i>Miscellaneous</i>              |                                           |                    |                    |                  |
| 2-Methylfuran                     | 0.02 <sup>a</sup>                         | 0.03 <sup>a</sup>  | 0.06 <sup>b</sup>  | B                |
| 2-Ethylfuran                      | 0.07 <sup>a</sup>                         | 0.12 <sup>a</sup>  | 0.11 <sup>a</sup>  | B                |
| Guaiacol (2-Methoxyphenol)        | 0.02 <sup>a</sup>                         | 0.02 <sup>a</sup>  | 0.02 <sup>a</sup>  | B                |
| Phenol                            | 0.06 <sup>a</sup>                         | 0.06 <sup>a</sup>  | 0.06 <sup>a</sup>  | A                |
| Dimethyl sulfide                  | 0.01 <sup>a</sup>                         | 0.06 <sup>a</sup>  | 0.04 <sup>a</sup>  | B                |

<sup>1</sup> RID: reliability of identification was set at three levels; A-level: agreement of retention index (RI) and mass spectrum with those of an authentic compound; B-level: difference of experimental RI to literature RI < 20 and mass spectrum similarity match > 900; C-level: at least mass spectrum similarity match > 800 [20].



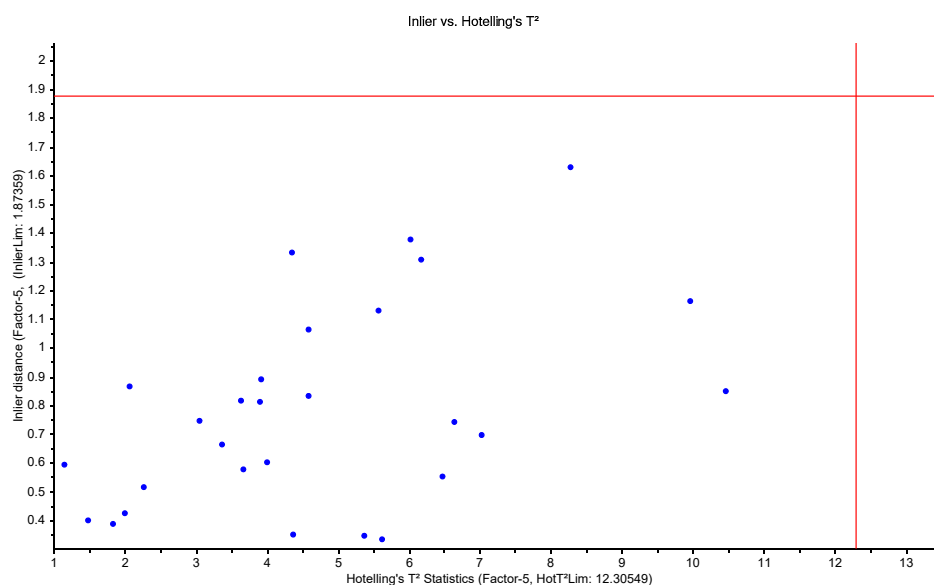

**Figure S3:** Inliers vs Hotelling's T2 plot of the predicted olive oil samples (blue dots) used in external validation of PLS-DA model. The associated critical limits (with a p-value of 5%) are displayed as horizontal and vertical red lines.

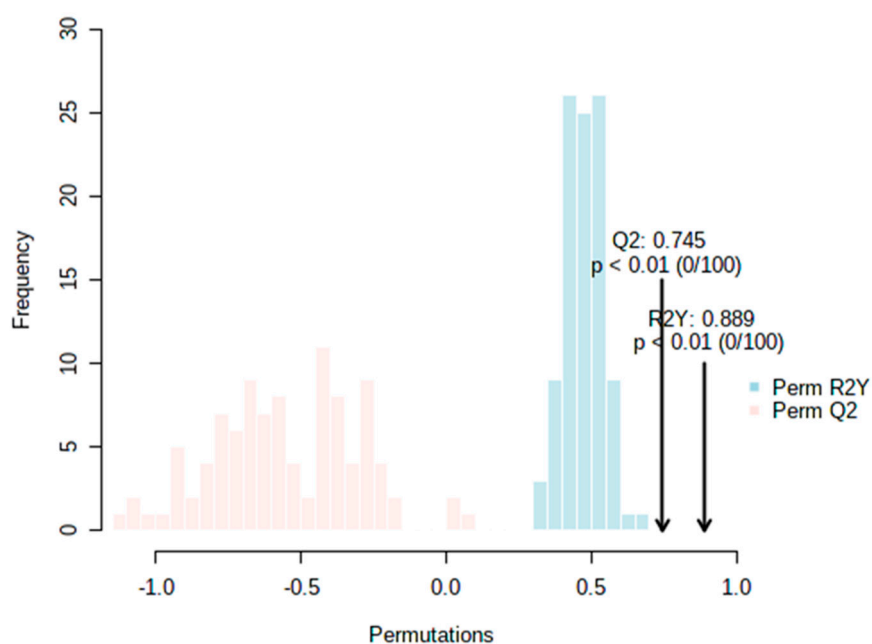

**Figure S4:** Permutation test of the OPLS-DA model

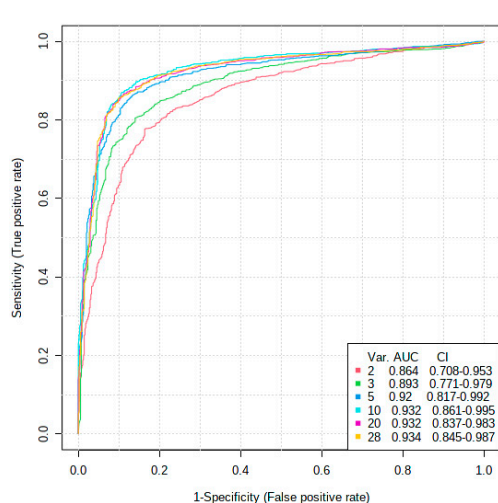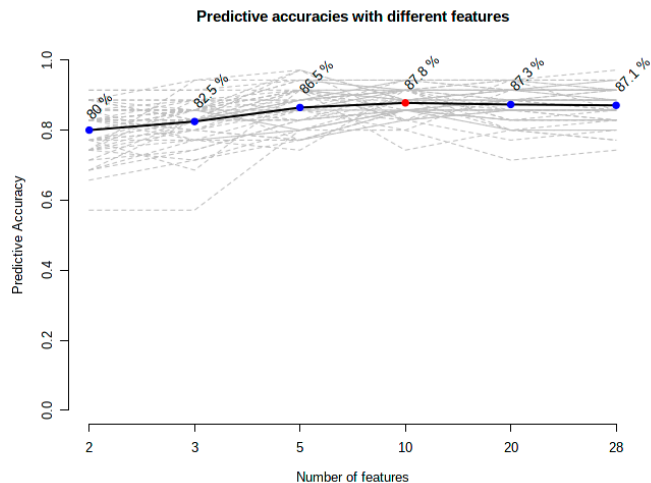

(a)

(b)

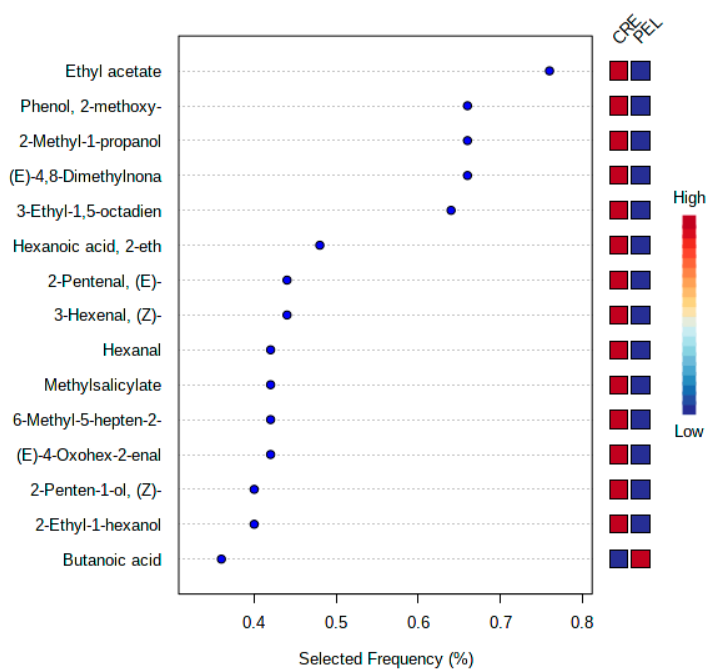

(c)

**Figure S5:** (a) ROC curves of all models resulted from the automated combination of 2, 3, 5, 10, 20 and 28 volatile compounds. The legend presents the AUC value and the corresponding confidence limits – CI for each model; (b) Plot of the predicted accuracies of each model with an increasing number of features (volatile compounds). The most accurate model is highlighted with a red dot; (c) Plot of the most important features of the selected model, ranked from most important to least important
